# Supplementary material for: Formation of ridges in a stable lithosphere in mantle convection models with a viscoplastic rheology
Source: PubMed Central journal article supplement — Geophys Res Lett. 2015 Jun 23;42(12):4770–7. doi: 10.1002/2015GL063483 (PMC5012122; doi:10.1002/2015gl063483), 2015-06-23
Supplement: GRL-42-4770-s003.pdf [file GRL-42-4770-s003.pdf]

1 **Supporting Information for "Formation of ridges in a**  
2 **stable lithosphere in mantle convection models with**  
3 **a visco-plastic rheology"**

A. Rozel<sup>1</sup>, G. J. Golabek<sup>1,2</sup>, R. Näf<sup>1</sup>, P. J. Tackley<sup>1</sup>

4 **Contents of this file**

- 5 1. Text S1: Mapping the ridge only regime in cartesian geometry  
6 2. Text S2: Surface fields  
7 3. Text S3: Strain-rate fields

---

Corresponding author: A. Rozel, Institute of Geophysics, Department of Earth Sciences, ETH Zurich, Sonneggstrasse 5, 8092 Zurich, Switzerland. (antoinerozel@gmail.com)

<sup>1</sup>Institute of Geophysics, Department of Earth Sciences, ETH Zurich, Sonneggstrasse 5, 8092 Zurich, Switzerland. (antoinerozel@gmail.com)

<sup>2</sup>Bayerisches Geoinstitut, University of Bayreuth, Universitätsstrasse 30, 95440 Bayreuth, Germany.

8 4. Text S4: Stationarity of the RO regime

9 5. Figure S1: Maps of convection regimes in cartesian geometry

10 6. Figure S2: Surface fields

11 7. Figure S3: Strain-rate fields

12 8. Figure S4: Initial temperature field

13 **Additional Supporting Information (Files uploaded separately)**

14 1. Caption for Table S1

15 2. Caption for Movie S1

16 **Introduction**

17 This supporting information file provides a discussion of the regimes obtained in carte-  
18 sian geometry (see text S1), as shown in figure S1. Surface fields are displayed in Fig. S2  
19 and discussed in text S2. The strain-rate fields corresponding to Fig. 1 are shown in Fig.  
20 S3 and discussed in text S3. Text S4 discusses in detail the generation and stationarity  
21 of the RO regime, which might depend on the initial temperature field depicted in Fig.  
22 S4. We also provide the caption for a table presenting the convection regimes obtained in  
23 all simulations (see table S1). Finally, a movie displaying alternating ridges, appearing at  
24 different sites while the convection mode changes, is discussed in section Movie S1.

25 **Text S1: Mapping the ridge only regime in cartesian geometry**

26 A preliminary set of simulations was performed in cartesian geometry employing an  
27 aspect ratio of 8:1 with periodic boundary conditions. The resolution in these models was  
28 512 x 64 grid points. In these experiments, the rheology used was slightly different than

29 what we present in the main article. In this supporting material, the viscosity was defined  
 30 as:

$$\eta = \eta_{ref} \exp \left( \frac{41.4465}{1+T} - \frac{41.4465}{2} + Vz' \right), \quad (1)$$

31 where  $z'$  is the dimensionless depth. This formulation is known as the Frank-Kamenetzki  
 32 approximation for the depth-dependent part of the viscosity. The temperature-dependent  
 33 part is identical to the original definition used in the main article. All other parameters  
 34 are identical to those applied in the main article and in the supporting information.

35 Fig. 1 shows the convection regimes obtained in this additional set of simulations  
 36 applying 2D cartesian geometry. For sake of comparison, we superimpose in gray the  
 37 data points and boundaries as obtained in 2D spherical annulus geometry (displayed in  
 38 Figure 3 of the main article). In both subplots, the stagnant lid regime is represented by  
 39 light blue color, the mobile lid regime is marked white, the episodic regime is represented  
 40 by orange (using fading colors for the boundary with mobile lid regime since it is not  
 41 precisely mapped out) and finally the RO regime is shown in purple. Cartesian simulations  
 42 are represented by black squares, filled with green for the cases displaying the RO regime,  
 43 or with red filling for the episodic regime.

44 The top panel of Fig. 1 shows that the RO regime can be present only for non-zero  
 45 vertical viscosity contrasts. For cases in which  $V = 0$ , the episodic regime occurs for a  
 46 considerable range of parameters, always being present between the mobile and stagnant  
 47 lid regimes. The RO regime area is shifted upwards to larger viscosity contrasts compared

48 to what was obtained in spherical annulus geometry. The RO regime is found in the same  
49 friction coefficient range for both spherical annulus and cartesian geometries.

50 The bottom panel of Fig. 1 shows that even in cartesian geometry the RO regime can  
51 only be found in simulations in which a vertical viscosity contrast of at least  $10^2$  is imposed.  
52 The RO regime region is found at a similar location in the parameter space, although only  
53 cases considering friction coefficients greater than 0.18 lead to a stable ridge only state.  
54 Moreover, the episodic regime was observed at the junction between mobile, stagnant and  
55 RO areas in the parameter space. This result shows that the episodic regime is more  
56 likely to appear in cartesian geometry, which is consistent with what has been reported  
57 by *Moresi and Solomatov* [1998]; *Stein et al.* [2004]. *Foley and Becker* [2009] found the  
58 episodic regime between mobile and stagnant lid regimes in 3D spherical geometries, using  
59 homogeneous yield stresses through the entire lithosphere.

60 **Text S2: Surface fields** Fig. S2 displays surface fields obtained in the simulations  
61 presented in Fig. 2 of the main paper (basal heating,  $V = 3.4012$ ,  $f = 0.1, 0.14$  and  $0.2$ )  
62 and for comparison a mobile-lid regime simulation ( $V = 0$ ,  $f = 0.04$ ,  $H = 10$ ). The top  
63 panel shows the horizontal profile of the Nusselt number and the bottom panel depicts the  
64 surface RMS velocity. Green curves represent a mobile lid case, orange curves show the  
65 episodic overturn presented in Fig. 2 in the main paper, purple curves displays the RO  
66 regime also shown in Fig. 2 and the light blue curve shows a simulation in the stagnant-lid  
67 regime.

68 The Nusselt number profile in the mobile lid regime (green curve) displays several peaks,  
69 corresponding to the ridge locations. In the regions surrounding the ridges the Nusselt

70 number values are around 10-15. In the episodic regime (orange curve), peaks similar  
71 to those observed in the mobile lid regime can also be found, but they do not occur  
72 everywhere since overturn events are localized. Regions of very small Nusselt number  
73 surround the peaks, corresponding to the downwellings and diffusive regions. In the  
74 stagnant lid regime, the Nusselt number oscillates between 2 and 6, following the cell  
75 geometry. In the RO regime (purple curve) only one peak is visible. Its maximum value is  
76 comparable to those observed for ridges in other regimes, but it is narrow and the Nusselt  
77 number outside the ridge region decreases rapidly to values comparable to those obtained  
78 in the stagnant-lid regime.

79 The bottom panel of Fig. S2 displays the surface RMS angular velocity obtained in  
80 the same models. Velocities follow a clear hierarchy from mobile down to episodic, RO  
81 and stagnant lid. The mobile lid regime displays a juxtaposition of plate-like blocks and  
82 angular velocities in the range 30 to 1000 can be observed (green curve). The velocity  
83 structure in the episodic regime is also block-shaped, but the magnitude is smaller than  
84 in the mobile-lid regime. The dimensionless velocity obtained in the RO regime (purple  
85 curve) shows a maximum at the ridge and decreases from 40 to 2 when moving away  
86 from the ridge. No plateau can be distinguished, which shows that the deformation is  
87 not localised like in mobile-lid or episodic regimes. A large depression reaching 0.01 can  
88 be observed at the antipode of the ridge (which is also visible in Fig. 1 in the main  
89 paper). The surface angular velocity in the stagnant lid regime, represented by the light  
90 blue curve, is small everywhere (between 0.01 and 1) and reflects the geometry of the  
91 underlying convection cells.

**Text S3: Strain-rate fields**

Fig. S3 represents the strain-rate fields for the simulations in the RO regime displayed in Fig. 1 in the main paper. We show these fields in the supporting information for a better readability of Fig. 1.

In both cases, the strain-rate patterns are divided into internal and lithospheric regions. In the internal regions, large strain-rates can be observed in upwellings and downwelling regions (yellow colours). In the basally heated simulation, the high strain-rate areas reach down to the core-mantle boundary due to the presence of plumes. In the mixed heated simulation, the strain-rate regions displaying large values are mainly localised below the lithosphere because there is very limited basal heating and the large activation volume results in a very high viscosity in the lower mantle, preventing the downwellings from reaching the core-mantle boundary.

Despite these differences, the lithospheric strain-rate is in both cases only half as much as in the convecting domain. Outside the convection cell that contains the ridge, the strain-rate is at least 3 times smaller than in the lithosphere above the main cell. In some places, the strain-rate even drops by 3 orders of magnitude compared to average lithospheric strain-rates. Therefore, the strain-rate pattern shows that the whole lithosphere surrounding the ridge slowly deforms instead of forming localised regions that would result in resurfacing events. This is valid for viscosity contrasts as large as 9 orders of magnitude. Due to the effect of plastic yielding, the effective viscosity contrast between the internal region and lithosphere is close to  $10^4$ - $10^5$ , as shown in Fig. 1.

**Text S4: Stationarity of the RO regime**

114 One can wonder whether the RO regime is an equilibrium state or not. In this study,  
115 we did not see the RO regime in a stationary state, but it was observed at statistical  
116 equilibrium. This is due to the fact that we only used a single bottom Rayleigh number  
117 for all simulations. Stationary states might be expected at lower Rayleigh number.

118 One important thing to keep in mind is that, the RO regime is itself asymmetrical,  
119 unlike stagnant-lid or mobile-lid regimes. When a solitary ridge forms, it stretches the  
120 corresponding convection cell, due to the associated spreading velocity. *Solomatov* [2004]  
121 showed that the second invariant of the stress in the lithosphere can be considered to be  
122 linearly proportional to the cell size. Therefore, when a ridge extends its cell, one can  
123 expect subduction zones to form at the edges of the cell, where stresses become larger with  
124 time. This is the main reason why RO regimes often destabilize and episodic overturns  
125 occur. The pink region in Fig. 3, labelled “Episodic-RO”, represents slightly different  
126 situations. In these cases, the ridge only is not stationary since the dominant cell extends  
127 and compresses the others. This forces one of the cells to disappear. This causes an  
128 increase of the lithospheric stress outside the dominant cell. Thus, an overturn occurs  
129 outside the dominant cell. Therefore the ridge itself does not cause subduction zones in  
130 its surrounding, but induces indirectly resurfacing events in the other cells.

131 However, a stable RO regime can be obtained in several situations. Movie S1 provided  
132 with this supporting information shows that ridges can stabilize when the convection  
133 degree stabilizes. In this case, there is no dominant cell, and ridges repeatedly appear at  
134 different sites. Thus, even if a ridge tends to extend its cell, it eventually disappears and  
135 another cell hosting a new ridge will push the first cell, causing it to shrink back to its

136 initial size. This leads to a state in which cells are successively extending and contracting.  
137 Another stable situation can be found when the convection degree is sufficiently low (in  
138 our case a degree-3). Under these circumstances, the dominant cell is more extended than  
139 the other cells, but its growth is stopped by the activity of the other cells. Finally, in  
140 the deep blue regions of Fig. 3, RO regime and stagnant lid occur alternatively. This is  
141 also a situation where ridges do not generate subduction zones although we cannot call  
142 this a ridge only at equilibrium. In such a case, it seems that the high friction coefficient  
143 does not allow for extensive ridge extension. Even in case dominant cells generate ridges,  
144 they cannot extend sufficiently to compress the other cells and decrease their number.  
145 On the contrary, the ridge generates large cold downwellings, which gather at the sides  
146 of the dominant cell (because of the depth-dependence of the viscosity). This results  
147 in slow cooling of the dominant cell. This cell then decreases in size, which allows an  
148 additional cell to form, halting the ridge activity due to the corresponding lithospheric  
149 stress reduction. A long-lasting stagnant lid regime is then established until the additional  
150 cell ceases. Larger stresses cause the formation of a new ridge, restarting the whole process.

151 The existence and stability of the ridge only regime is critically dependent on the con-  
152 vection degree of the system. RO regime at equilibrium can be reached in case the number  
153 of cells stabilizes.

154 Finally, Fig. S4 shows the initial temperature field used in all cases. The initial condi-  
155 tions might have some importance since it has been shown that the convection regime can  
156 be history-dependent. This is especially relevant close to the boundary between mobile-lid  
157 and stagnant-lid regime [*Weller and Lenardic, 2012*]. Our initial field represents a warm



158 situation, relevant for a young planetary body. A lithosphere of reasonable thickness is  
159 prescribed from the start, corresponding to a stagnant lid situation, but it also provid-  
160 ing a non-negligible weight on the top boundary layer. Our initial condition favors the  
161 persistence of the stagnant lid regime, since a large number of plumes forms early on, in  
162 the low viscosity (low stress) internal region. The regime map displayed in Fig. 3 might  
163 be slightly affected by the choice of the initial temperature field, but our arguments and  
164 observations would undoubtedly hold, although some regime boundaries might be shifted.  
165 Our initial condition is consistent with early conditions of planets and satellites, expected  
166 to be hot due to gravitational energy converted during accretion and differentiation of the  
167 body and due to high radiogenic heating rates.

168 **Figure S1: Regime maps in Cartesian geometry**

169 **Figure S2: Surface fields**

170 **Figure S3: Strain-rate fields**

171 **Figure S4: Initial temperature field**

172 **Table S1.**

173 A large table containing the results of all simulations is provided in a separate Excel  
174 file. The table provide for each simulation: the activation volume  $V$  (column 1), the  
175 corresponding vertical viscosity contrast (column 2), the friction coefficient  $f$  (column 3),  
176 the convection regime obtained at statistical equilibrium (column 4), the heating mode  
177 (column 5) and the geometry used (column 6).

178 **Movie S1.**

179 The movie named MovieS1.avi presents the temperature, viscosity, strain-rate, velocity  
180 and stress fields of the simulation considering  $V = 18.4207$  and  $f = 0.4$  in 2D spherical  
181 annulus geometry with mixed heating. This animation shows a case in which ridges  
182 repeatedly form at preferential sites following the degree imposed by the internal activity  
183 without ever breaking the lid. Preferential sites, which could potentially host a new ridge  
184 once the active one disappears, can be seen in the stress field, but the next position of  
185 the ridge is hardly predictable.

## References

- 186 Foley, B., and T. Becker (2009), Generation of plate-like behavior and mantle heterogene-  
187 ity form a spherical, viscoplastic convection model, *Geoch. Geophys. Geosys.*, *10*(8),  
188 doi:10.1029/2009GC002378.
- 189 Moresi, L., and V. Solomatov (1998), Mantle convection with a brittle lithosphere:  
190 Thoughts on the global tectonic style of the Earth and Venus, *Geophys. J.*, *133*, 669–682.
- 191 Solomatov, V. S. (2004), Initiation of subduction by small-scale convection, *Journ. Geo-*  
192 *phys. Res.*, *109*, B01,412.
- 193 Stein, C., J. Schmalzl, and U. Hansen (2004), The effect of rheological parameters on  
194 plate behaviour in a self-consistent model of mantle convection, *Phys. Earth. and Plan.*  
195 *Int.*, *142*, 225–255.
- 196 Weller, M., and A. Lenardic (2012), Hysteresis in mantle convection: Plate tectonics  
197 systems, *Geophys. Res. Lett.*, *39*(L10202), doi:10.1029/2012GL051232.

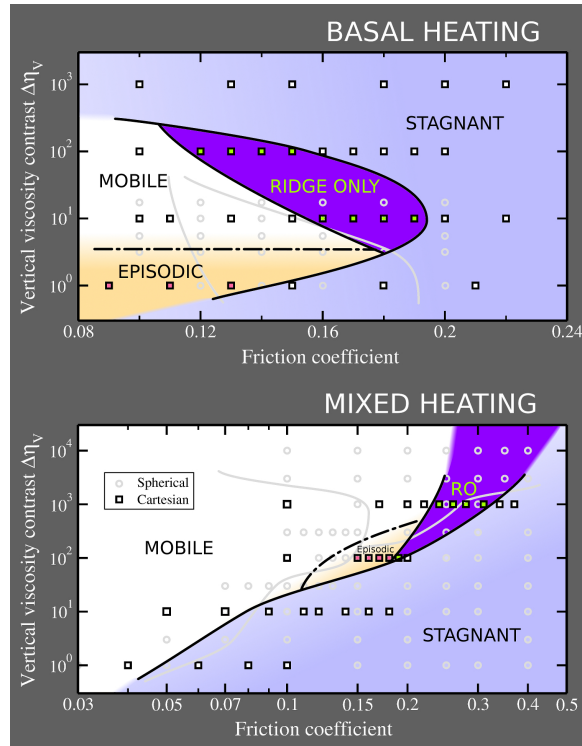

**Figure 1.** Maps of convection regimes in cartesian geometry for basal heating simulations (top) and mixed heating cases (bottom). See section Text S1 for a detailed description.

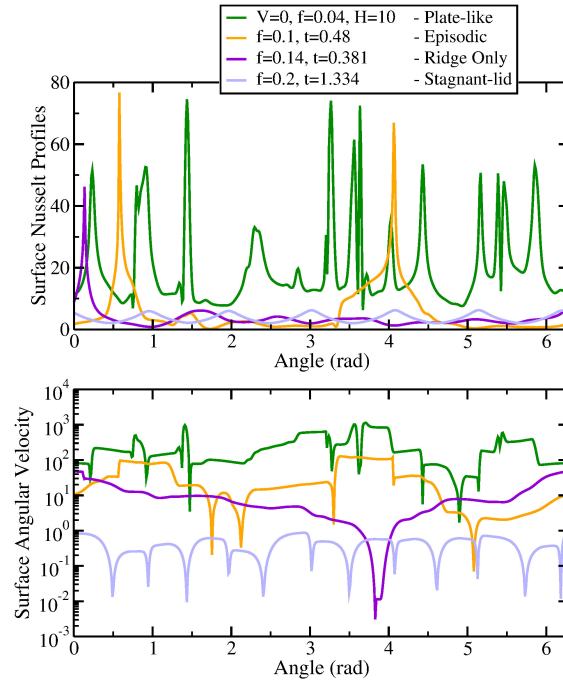

**Figure 2.** Surface Nusselt number profiles (top) and surface RMS angular velocities (bottom) for selected cases corresponding to the figures in the main article, considering  $V = 3.4012$  and basal heating (orange, purple and blue curves) or  $V = 0$  and mixed heating (green curve).

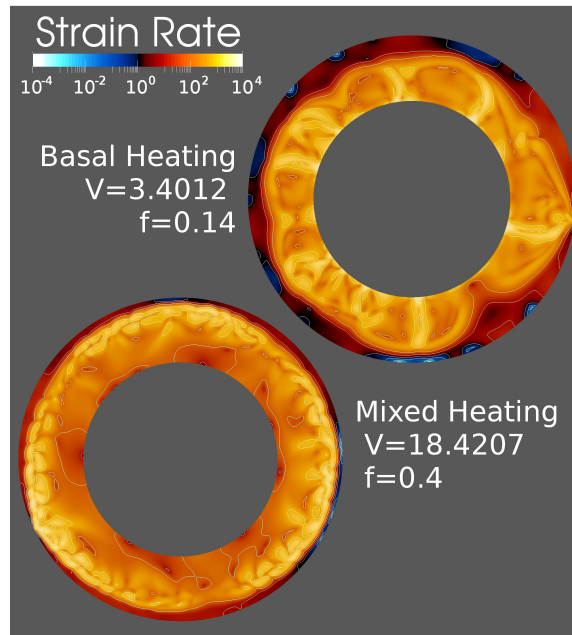

**Figure 3.** Second invariants of the strain-rate field in the basal heating (top) and mixed heating (bottom) simulations presented in Fig. 1 of the main article.

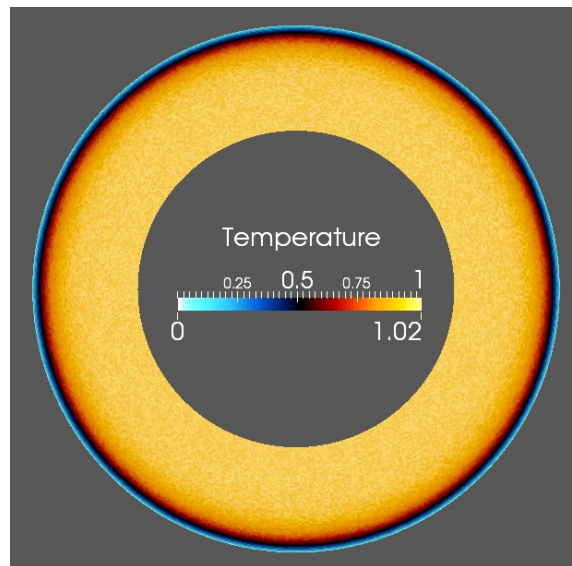

**Figure 4.** Initial temperature field used in all cases: a top thermal boundary layer is imposed. The internal non-dimensional temperature is set to 1. We superimpose everywhere a white noise of  $\pm 0.25$ .
